# Supplementary figures and images for: Epithelial–Mesenchymal Transition Suppression by ML210 Enhances Gemcitabine Anti-Tumor Effects on PDAC Cells
Source: MDPI journal article supplement (doi:10.3390/biom15010070), 2025-01-06

Fig.3E

## 2 Vimentin

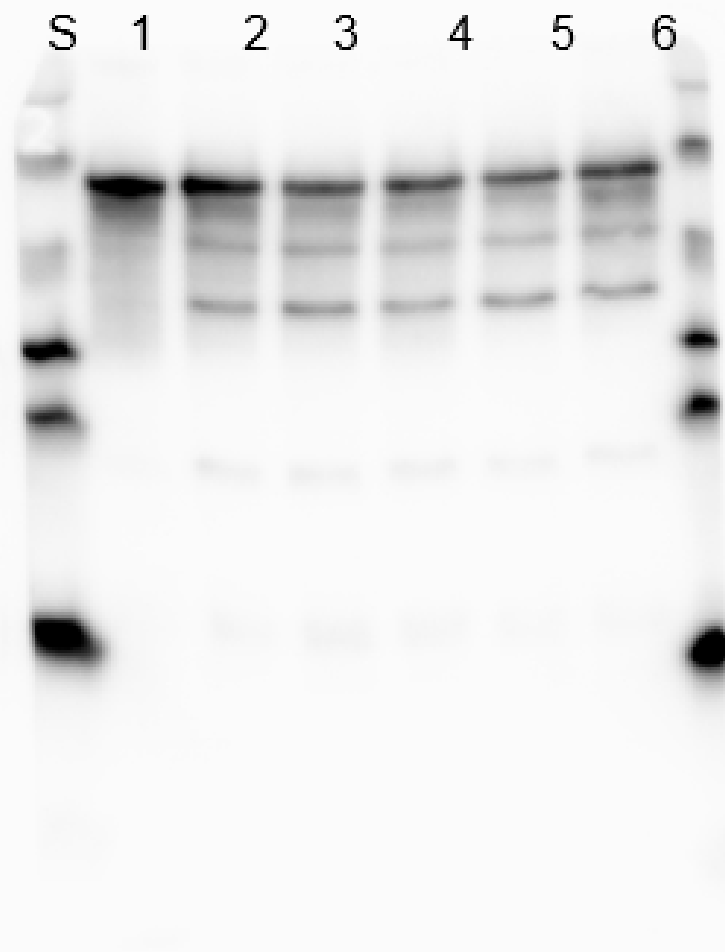

## 3 GPX4

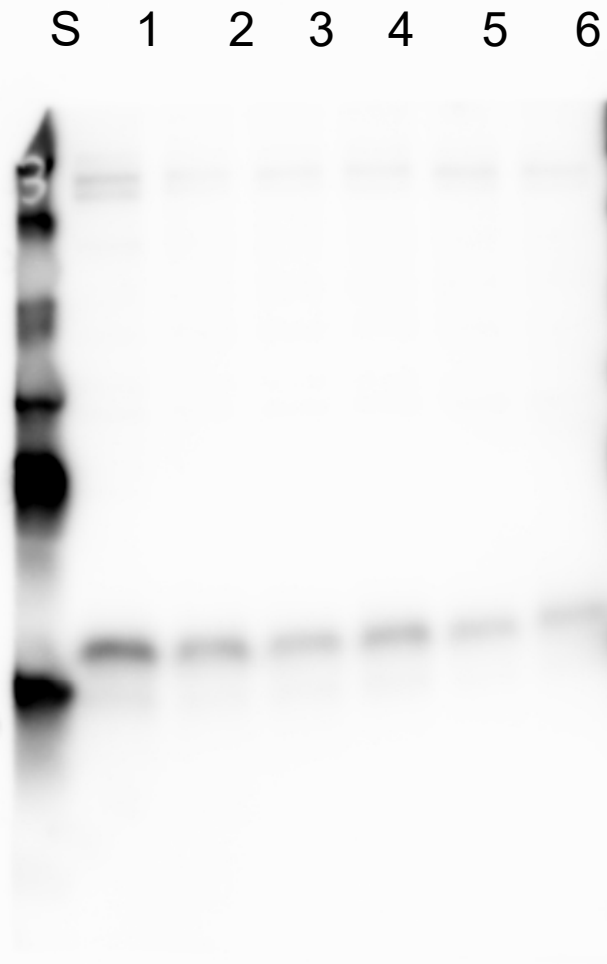

## 4 tubulin

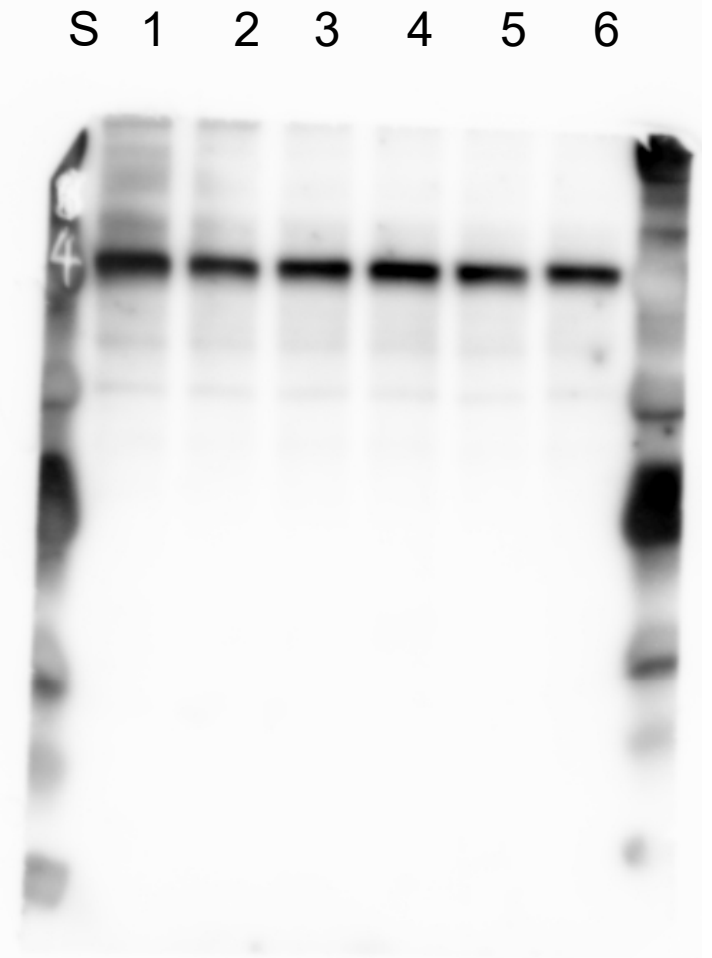

Fig.4A

Vimentin

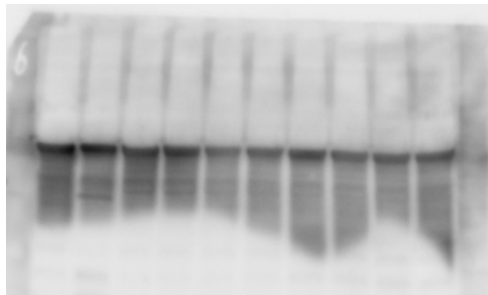

GPX4

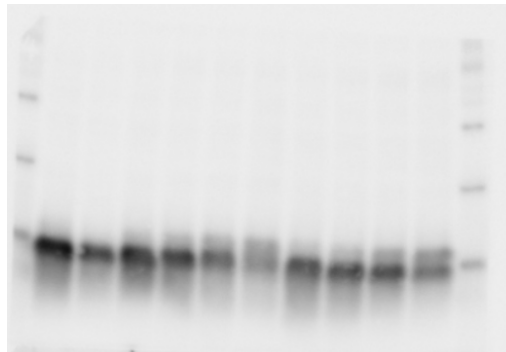

Clvd-Cas3

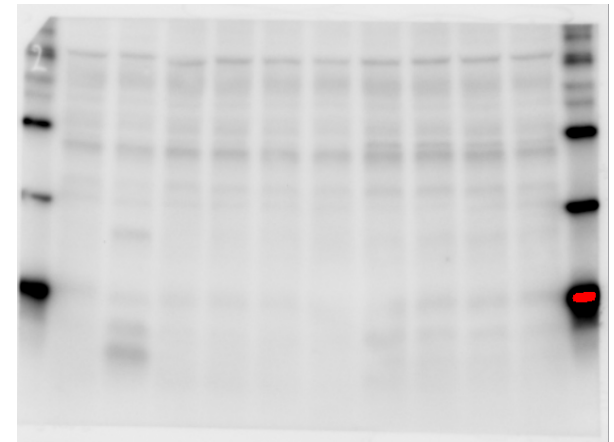

tubulin

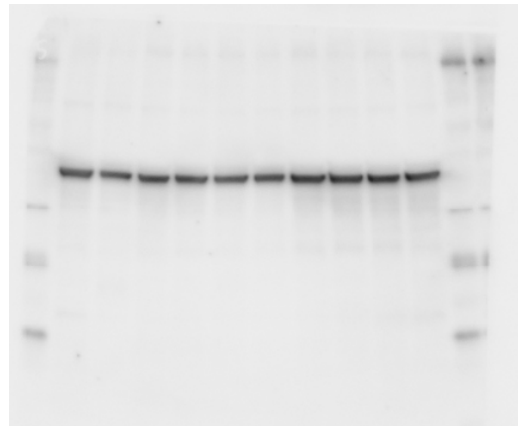

Fig.5A

Vimentin

GPX4

tubulin

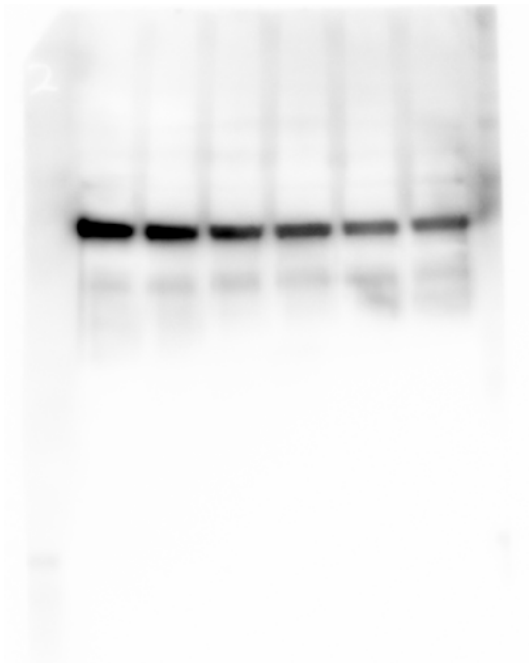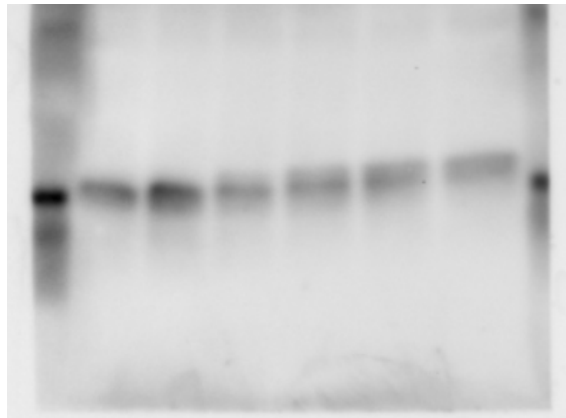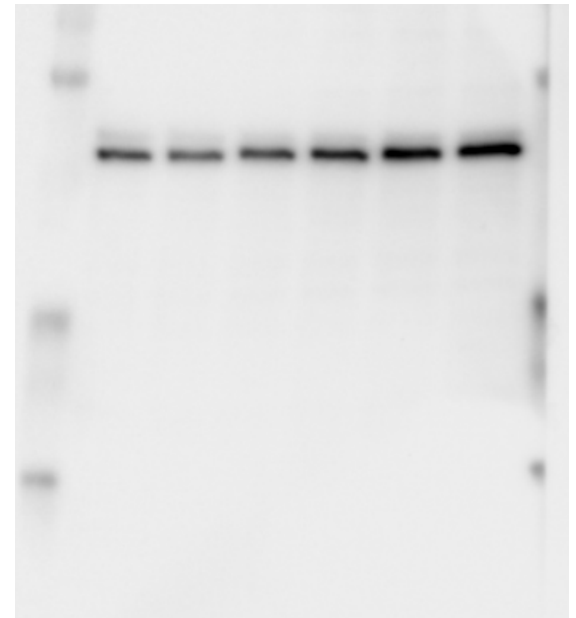

Supplement: s1 [file Supplementary figure1_blotting.pdf › Supplementary files/Supplementary figure1_blotting.pdf]
